CORRECTION

# Correction: Advance Care Planning in Dementia: Do Family Carers Know the Treatment Preferences of People with Early Dementia?

Karen Harrison Dening, Michael King, Louise Jones, Victoria Vickerstaff, Elizabeth L. Sampson

The fourth author's name is spelled incorrectly. The correct name is: Victoria Vickerstaff.

## Reference

1. Harrison Dening K, King M, Jones L, Vickerstaff V, Sampson EL (2016) Advance Care Planning in Dementia: Do Family Carers Know the Treatment Preferences of People with Early Dementia? PLoS ONE 11(7): e0159056. doi:[10.1371/journal.pone.0159056](https://doi.org/10.1371/journal.pone.0159056) PMID: [27410259](https://pubmed.ncbi.nlm.nih.gov/27410259/)

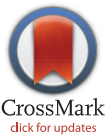

## OPEN ACCESS

**Citation:** Harrison Dening K, King M, Jones L, Vickerstaff V, Sampson EL (2016) Correction: Advance Care Planning in Dementia: Do Family Carers Know the Treatment Preferences of People with Early Dementia? PLoS ONE 11(8): e0161142. doi:[10.1371/journal.pone.0161142](https://doi.org/10.1371/journal.pone.0161142)

**Published:** August 9, 2016

**Copyright:** © 2016 Harrison Dening et al. This is an open access article distributed under the terms of the [Creative Commons Attribution License](https://creativecommons.org/licenses/by/4.0/), which permits unrestricted use, distribution, and reproduction in any medium, provided the original author and source are credited.
